# Supplementary material for: The Prognostic Impact of the Number of Metastatic Lymph Nodes and a New Prognostic Scoring System for Recurrence in Early-Stage Cervical Cancer with High Risk Factors: A Multicenter Cohort Study (KROG 15-04)
Source: PubMed Central journal article supplement — Cancer Res Treat. 2017 Oct 24;50(3):964–74. doi: 10.4143/crt.2017.346 (PMC6056979; doi:10.4143/crt.2017.346), 2017-10-24
Supplement: crt-2017-346-suppl1.pdf [file crt-2017-346-suppl1.pdf]

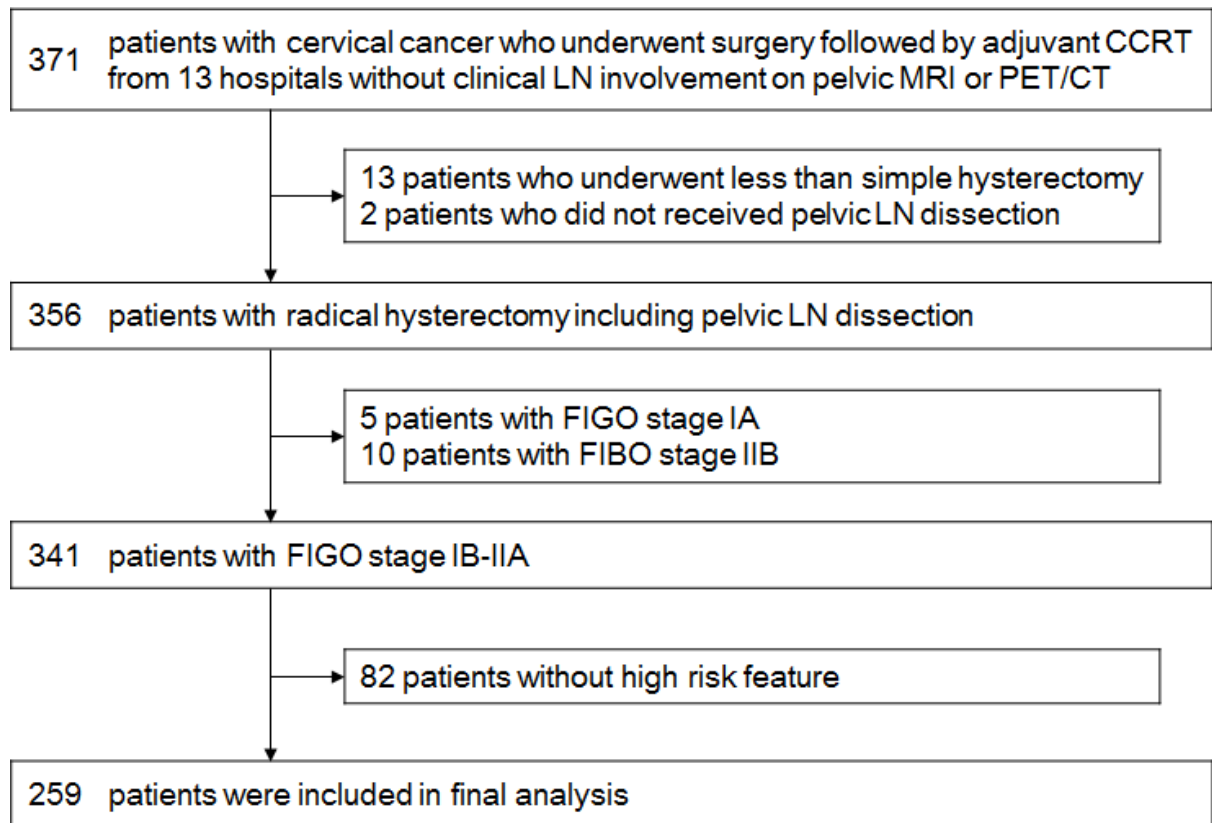

**S1 Fig.** Flow diagram of the patient selection. CCRT, concurrent chemoradiation therapy; LN, lymph node; MRI, magnetic resonance imaging; PET/CT, positron emission tomography/computed tomography; FIGO, International Federation of Gynecology and Obstetrics.
