# Supplementary material for: The Prognostic Impact of the Number of Metastatic Lymph Nodes and a New Prognostic Scoring System for Recurrence in Early-Stage Cervical Cancer with High Risk Factors: A Multicenter Cohort Study (KROG 15-04)
Source: PubMed Central journal article supplement — Cancer Res Treat. 2017 Oct 24;50(3):964–74. doi: 10.4143/crt.2017.346 (PMC6056979; doi:10.4143/crt.2017.346), 2017-10-24
Supplement: crt-2017-346-suppl3.pdf [file crt-2017-346-suppl3.pdf]

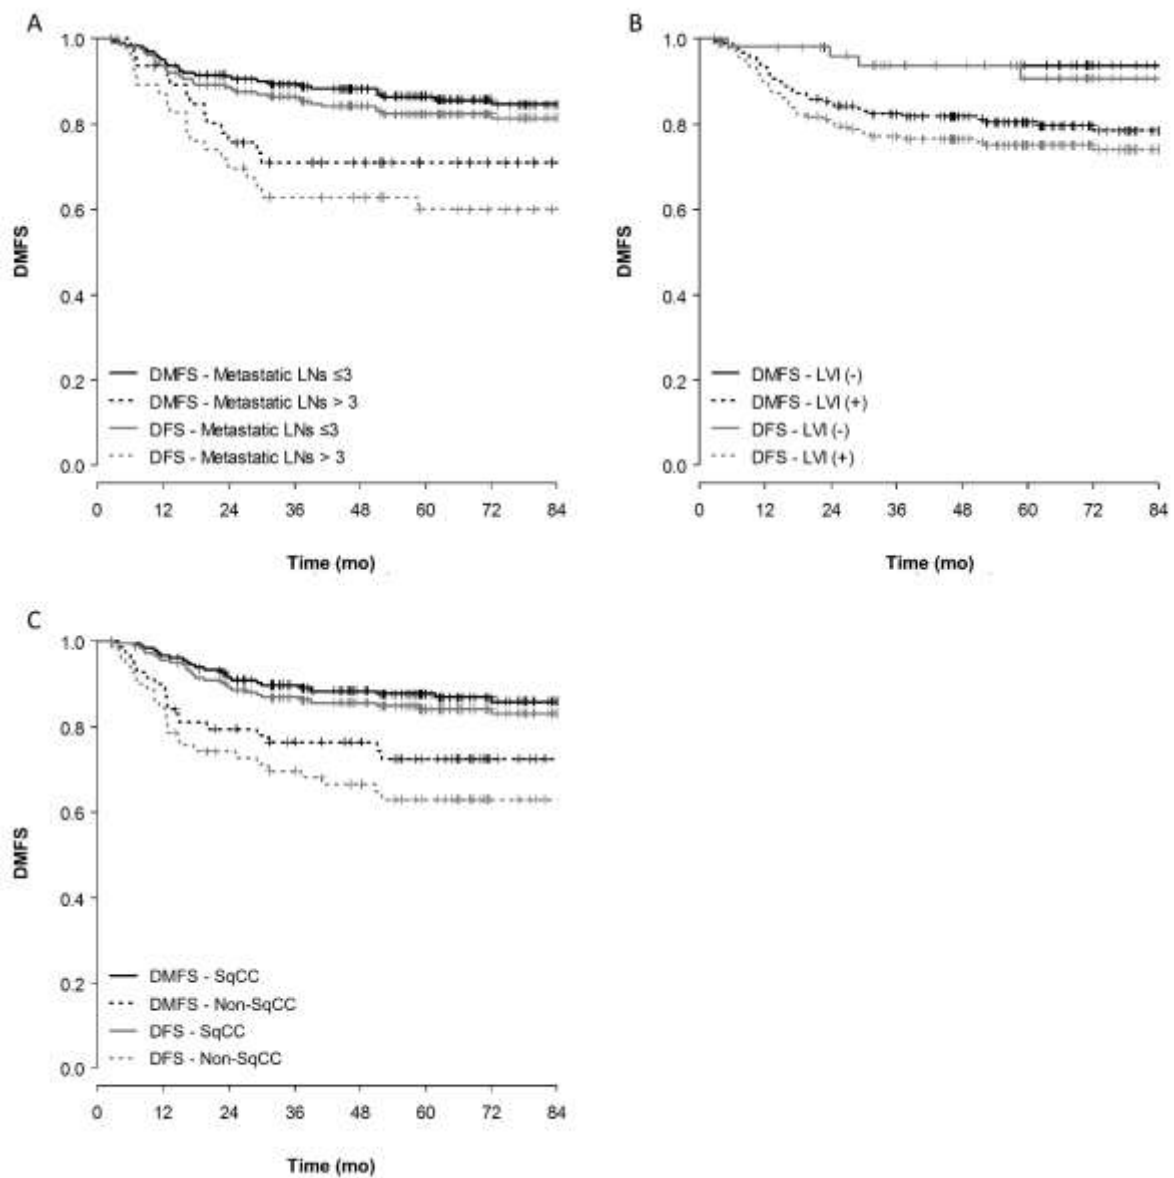

**S3 Fig.** Distant metastasis-free survival (DMFS) and disease-free survival (DFS) curves according to number of metastatic lymph nodes (LNs) (A), lymphovascular invasion (LVI) (B), and histology (C). SqCC, squamous cell carcinoma.
