# Supplementary figures and images for: The Prognostic Impact of the Number of Metastatic Lymph Nodes and a New Prognostic Scoring System for Recurrence in Early-Stage Cervical Cancer with High Risk Factors: A Multicenter Cohort Study (KROG 15-04)
Source: PubMed Central journal article supplement — Cancer Res Treat. 2017 Oct 24;50(3):964–74. doi: 10.4143/crt.2017.346 (PMC6056979; doi:10.4143/crt.2017.346), 2017-10-24

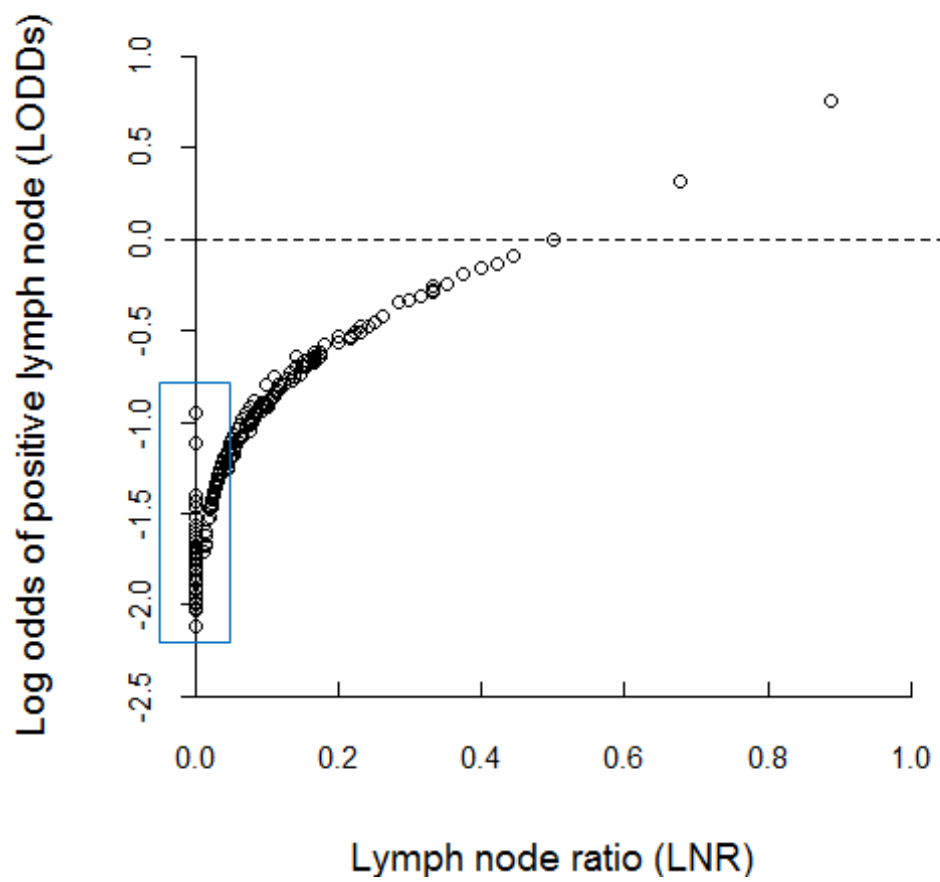

**S4 Fig.** Distribution of LODDs by LNR.

Supplement: crt-2017-346-suppl4.pdf [file crt-2017-346-suppl4.pdf]
